# Supplementary material for: Measurement of Myofilament-Localized Calcium Dynamics in Adult Cardiomyocytes and the Effect of Hypertrophic Cardiomyopathy Mutations
Source: PubMed Central journal article supplement (PMC6485313; doi:10.1161/circresaha.118.314600), 2019-04-11
Supplement: res-124-1228-s002.pdf [file res-124-1228-s002.pdf]

## **SUPPLEMENTAL MATERIAL**

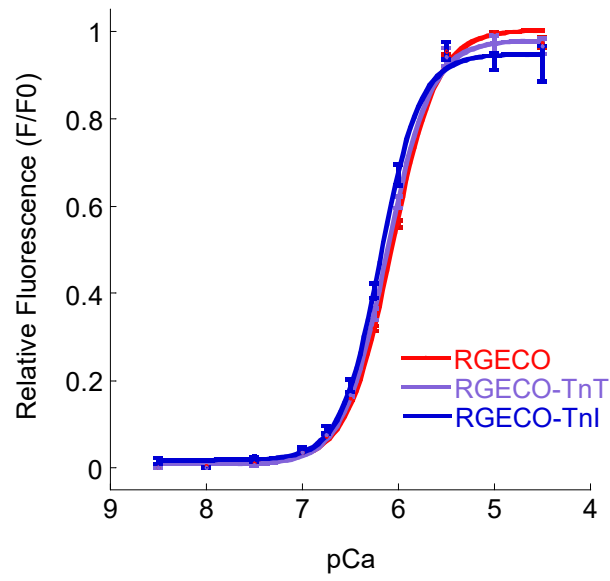

**Online Figure I. Ca<sup>2+</sup> binding affinity plot of RGECO, RGECO-TnT and RGECO-TnI.** The steady state Ca<sup>2+</sup> binding affinity of purified recombinant RGECO (red lines) RGECO-TnT (purple lines) and RGECO-TnI (blue lines) was assessed by analysis of the fluorescence/pCa relationship at 37 °C, 1.3 mM MgCl<sub>2</sub> and pH 7.3 (n=4).

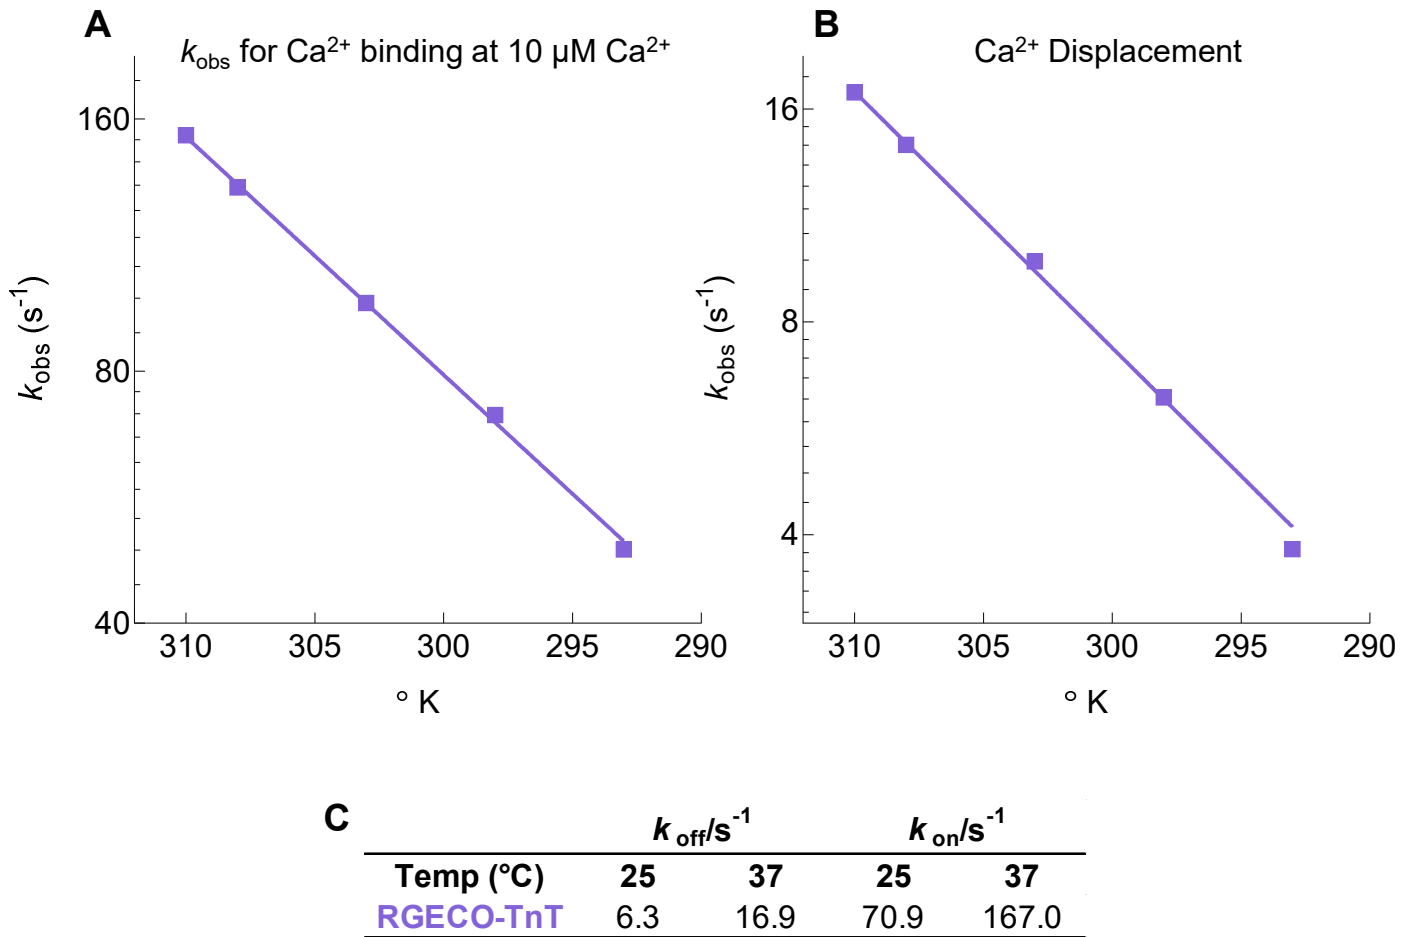

**Online Figure II. Kinetic determination of  $k_{\text{on}}$  and  $k_{\text{off}}$  for RGECO-TnT by stopped flow.** Arrhenius plots of the observed rate constant of  $\text{Ca}^{2+}$  binding (**A**) and  $\text{Ca}^{2+}$  release rate constant (**B**) as determined by stopped flow measurement of  $0.125 \mu\text{M}$  purified RGECO-TnT protein. Data for room ( $25 \text{ }^\circ\text{C}$ ) and body ( $37 \text{ }^\circ\text{C}$ ) temperature are shown in (**C**).

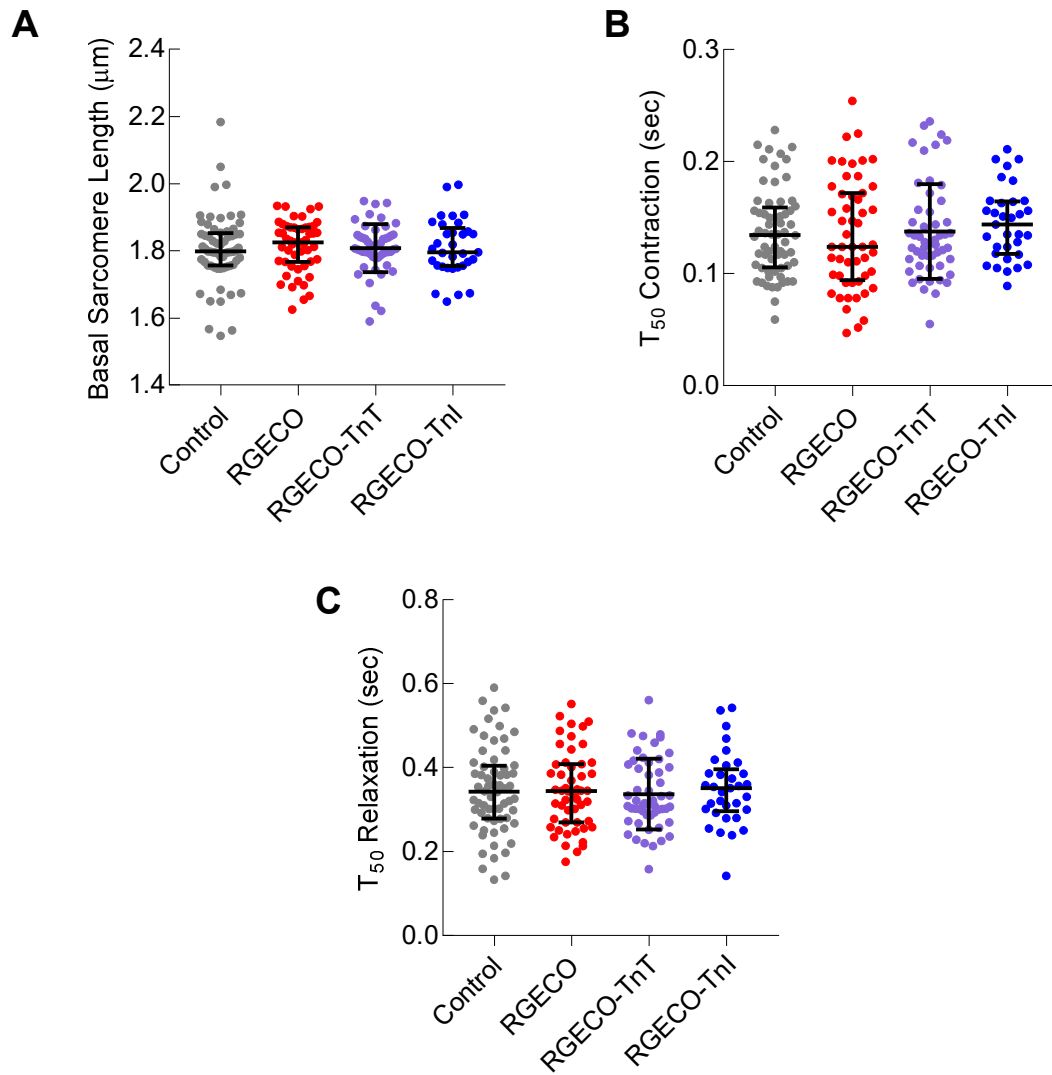

**Online Figure III. Contractile properties of RGECO, RGECO-TnT and RGECO-TnI.** Contractile parameters during electrical paced (0.5 Hz) of isolated adult cardiomyocytes transduced and either RGECO, RGECO-TnT or RGECO-TnI showing no change in basal sarcomere length (A), time to 50% contraction (B) or time to 50% relaxation (C) (n=33-64 cells from n=3 isolations).

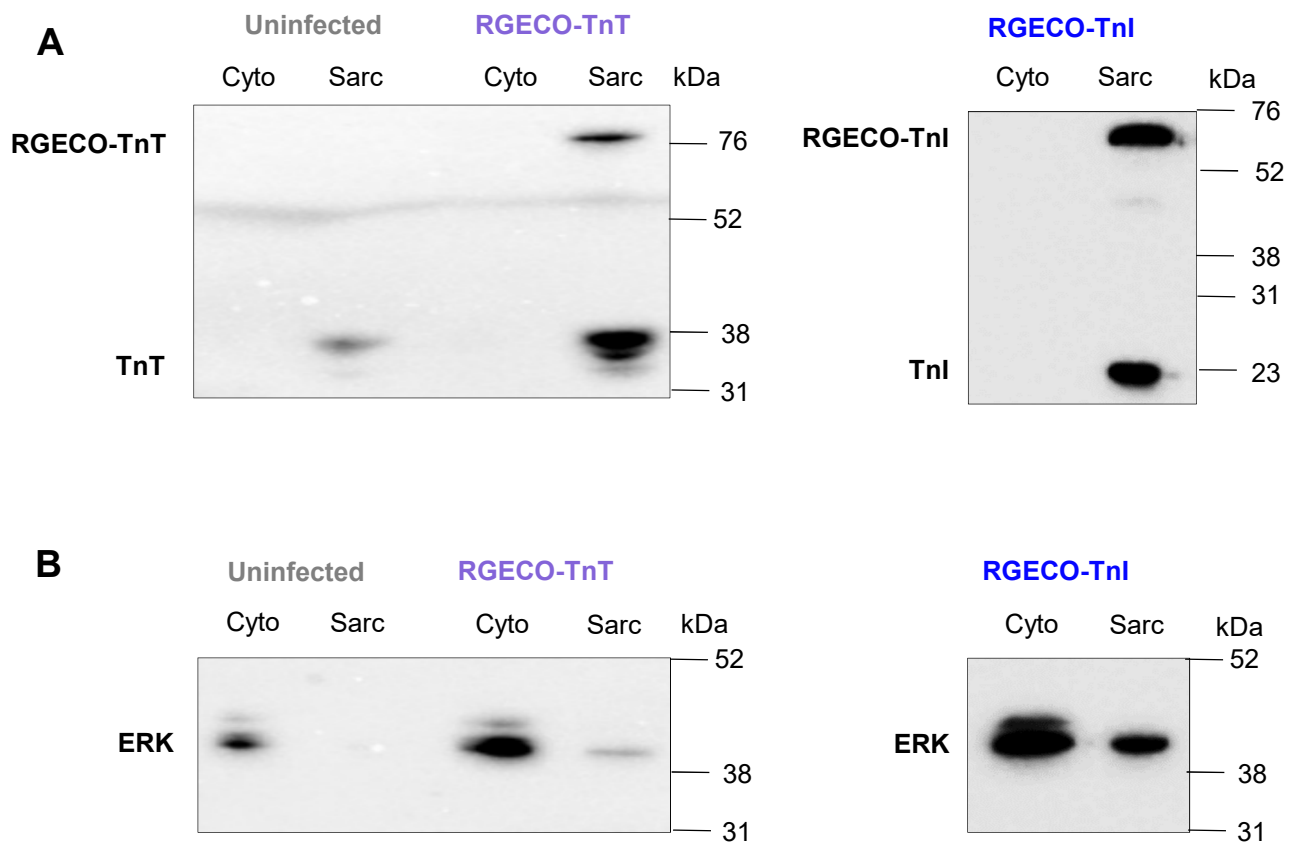

**Online Figure IV. Subcellular fractionation of GPCMs expressing RGECO-TnT and RGECO-TnI.** The relative subcellular incorporation of RGECO-TnT or RGECO-TnI was assessed by subcellular fractionation of GPCMs 48 hours after adenoviral infection. Western blots using anti-cTnT or anti-cTnI gave an endogenous band and a conjugate band on the sarcomeric fraction (sarc) (A). Re-probing with the predominantly cytoplasmic marker anti-ERK showed that subcellular fractionation was of high fidelity (B).

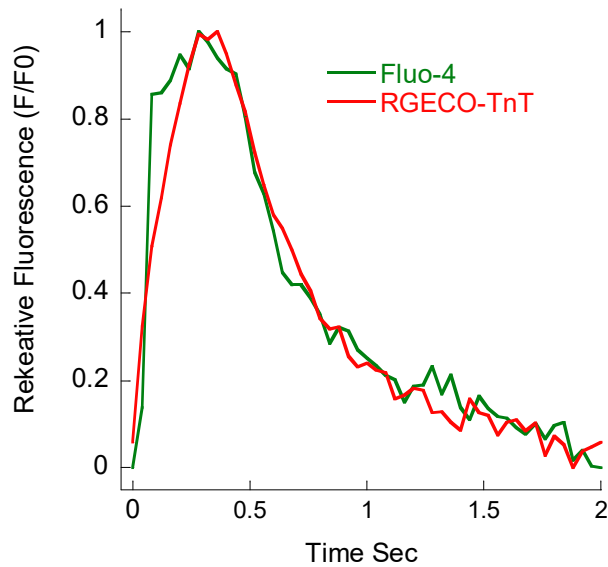

|                           | Fluo-4      | RGECO-TnT     |
|---------------------------|-------------|---------------|
| T <sub>50</sub> on (sec)  | 0.059±0.003 | 0.088±0.004 * |
| T <sub>50</sub> off (sec) | 0.418±0.026 | 0.316±0.038 * |

**Online Figure V. The on and off rates of Ca<sup>2+</sup> transients measured with Fluo-4 are significantly different to RGECO-TnT in simultaneous measurements if dye and sensor in the same cell.** Fluorescence measurements taken from cells loaded with 0.5 μmol/L Fluo-4 and expressing RGECO-TnT were measured at 488 nm and 595 nm respectively. Emitted transients were from the same cell and therefore enabled direct pairwise comparison of T<sub>50</sub> on and T<sub>50</sub> off rates (n=82 cells from n=3 isolations). Data presented as mean ± SEM, \* = p<0.05, using Wilcoxon paired t-test.

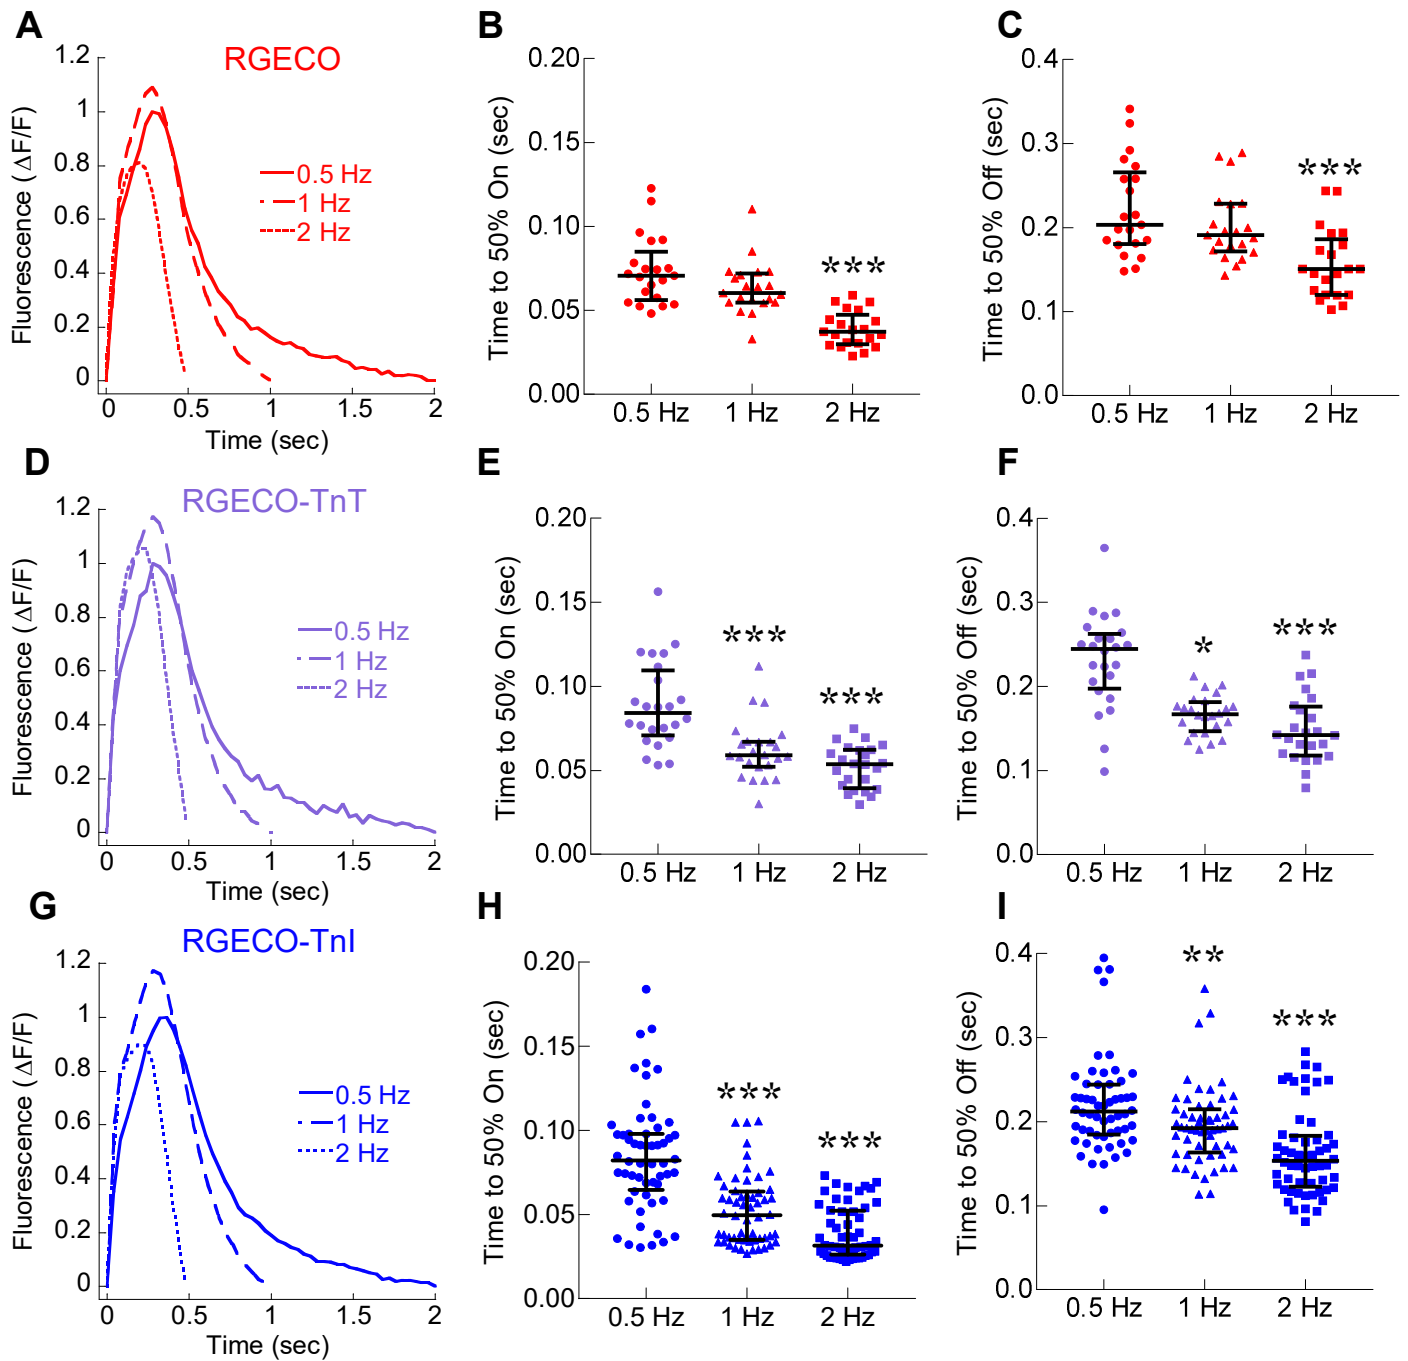

**Online Figure VI. RGECO, RGECO-TnT and RGECO-TnI Ca<sup>2+</sup> transients show reverse rate dependence in times to 50% on and 50% off in response to increased pacing frequency in adult GPCMs.** Averaged Ca<sup>2+</sup> transients of electrically paced isolated adult cardiomyocytes was used to compare pacing frequencies of 0.5 Hz, 1.0 Hz and 2 Hz using either RGECO (A), RGECO-TnT (D) or RGECO-TnI (G). Adjacent dot plots show distributions of time to 50% binding, and 50% release rates across the pacing range. Shortening of both parameters is apparent for all indicators (RGECO (B and C) (n=21 cells from n=2 isolations), RGECO-TnT (E and F) (n=24 cells from n=2 isolations), and RGECO-TnI (H and I) (n=56 cells from n=3 isolations)). Lines give the median average and error bars are  $\pm$  interquartile range \* = p<0.05, \*\* = p<0.01 and \*\*\* = p<0.001 using one way ANOVA.

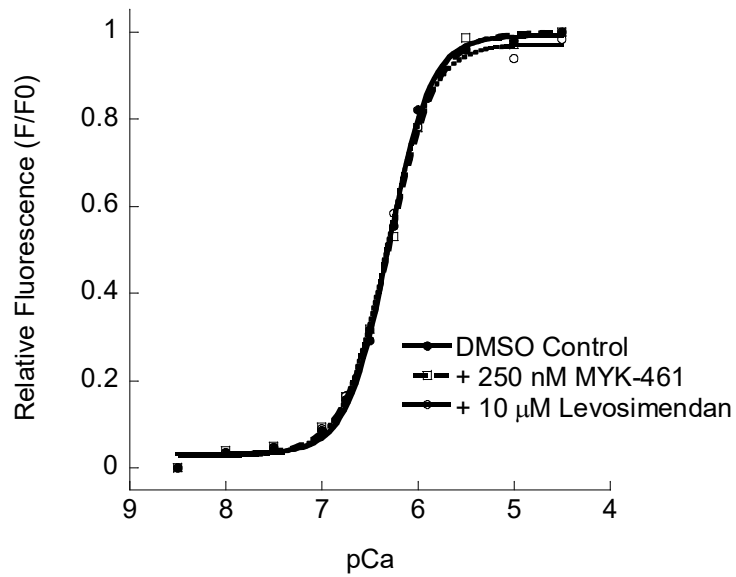

|                     | $K_d$             | p     |
|---------------------|-------------------|-------|
| <b>Control</b>      | $502 \pm 23.0$ nM |       |
| <b>MYK461</b>       | $522 \pm 26.9$ nM | 0.602 |
| <b>Levosimendan</b> | $475 \pm 19.3$ nM | 0.471 |

**Online Figure VII. MYK-461 and levosimendan had no direct effect on the function of the RGECO-TnT.** Fluorescence : pCa relationship in the presence of 250 nmol/L MYK-461 and 10  $\mu$ mol/L levosimendan was used to calculate the  $K_d$  values tabulated beneath (n=4). Significance values (p) were calculated using one way ANOVA.



### Cytoplasmic RGECO

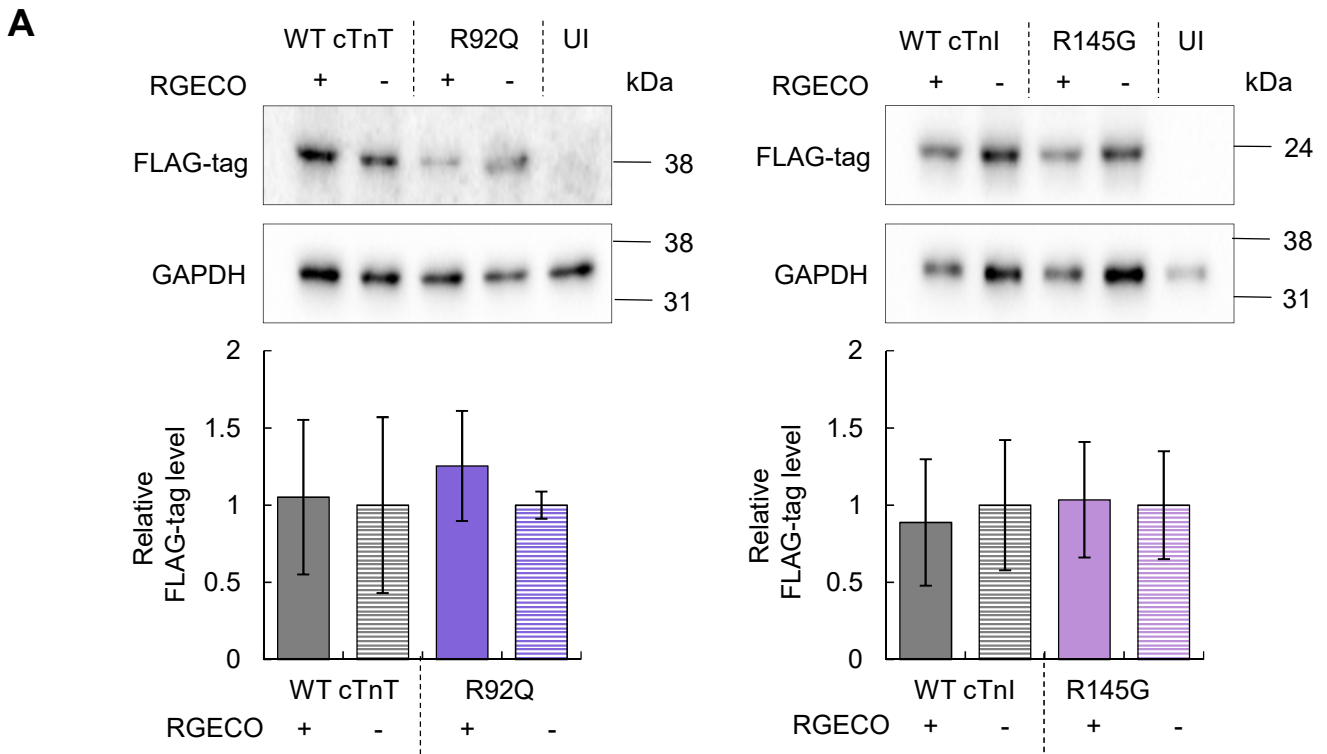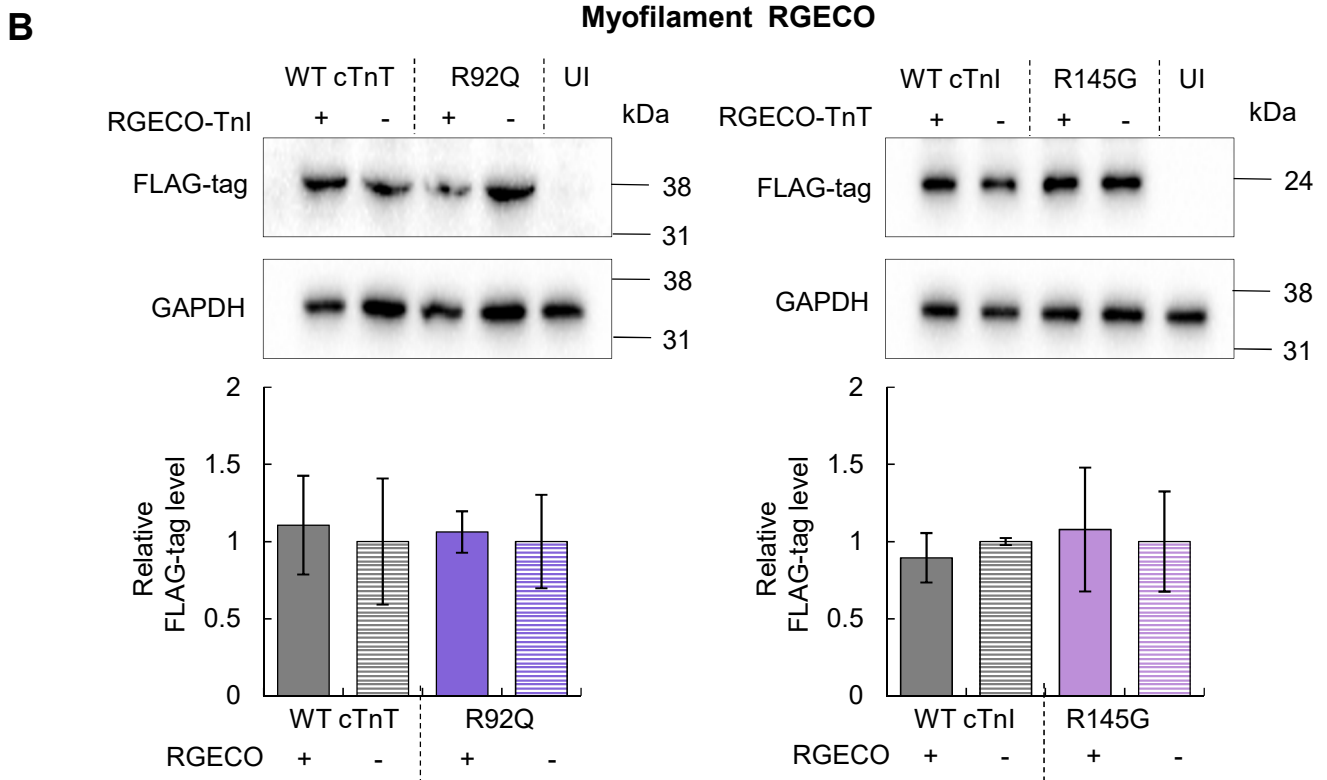

**Online Figure VIII. Effect of dual transduction versus single transduction of adenoviruses on FLAG-tag expression.** Western blot analysis of GPCMs transduced with WT cTnT, cTnT R92Q, WT cTnI, or cTnI R145G ± RGECO (A) or RGECO-TnI/RGECO-TnT (B), or uninfected control (UI). Showing no significant effect on FLAG-tag expression between dual transduction with the Ca<sup>2+</sup> sensor and single transduction without the Ca<sup>2+</sup> sensor, n=5.

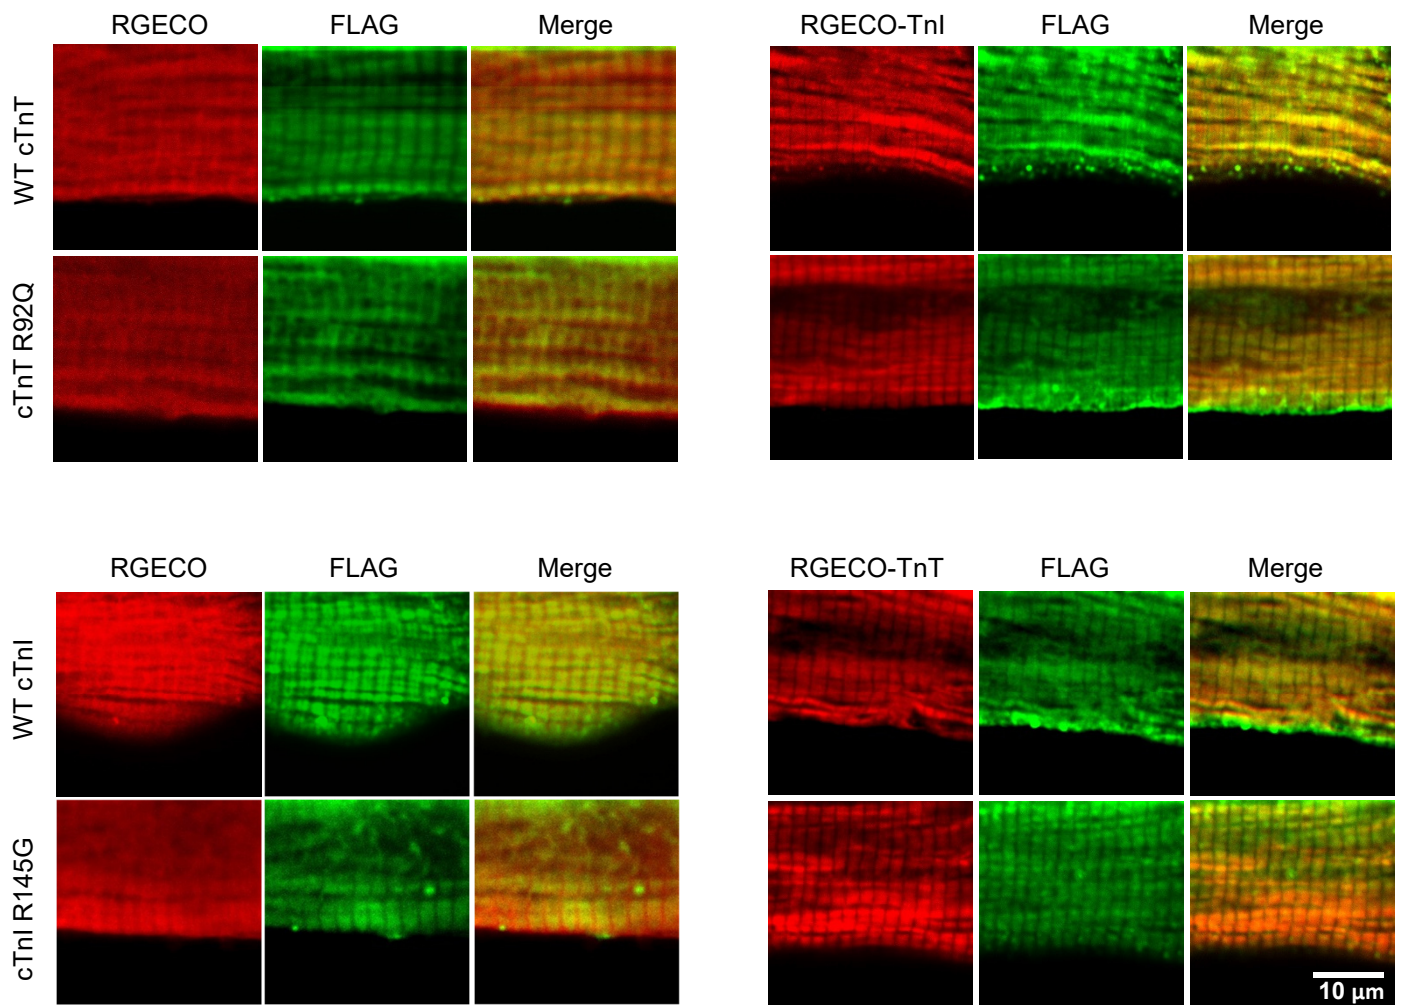

**Online Figure IX. Effect of dual transduction on the localisation of FLAG-tag expressed protein.**

Immunofluorescence analysis of GPCMs transduced with WT cTnT, cTnT R92Q, WT cTnI, or cTnI R145G ± RGECO/RGECO-TnI/RGECO-TnT was performed using anti-FLAG tag (green) and anti-DsRed antibodies. No significant alterations to the I band localisation of FLAG-tag protein was observed between dual transduction with the Ca<sup>2+</sup> sensor and previously described single transduction without the Ca<sup>2+</sup> sensor.

## RGECO-TnT DNA sequence

ATGGTAGACTCATCACGTCGTAAGTGAATAAGGCAGGTCACGCAGTCAGAGCTATAGGTTCGGCTGAGCTACCCCGTGGTT  
TCCGAGCGGATGTACCCCGAGGACGGCGCCCTCAAGAGCGAGATCAAGAAGGGGCTGAGGCTGAAGGACGGCGCCACTAC  
GCCGCCGAGGTCAAGACCACCTACAAGGCCAAGAAGCCCGTGCAGCTGCCCGGCGCTACATCGTAGACATCAAGTTGGAC  
ATCGTGTCCACAACGAGGACTACACCATCGTGGAACAGTGCGAACGCGCCGAGGGCCGCACTCCACCGGCGGCATGGAC  
GAGCTATAACAAGGGAGGTACAGGCGGGAGTCTGGTGGCAAGGGCGAGGAGGATAACATGGCCATCATCAAGGAGTTCATG  
CGCTTCAAGGTGCACATGGAGGGCTCCGTGAACGGCCACGAGTTCGAGATCGAGGGCGAGGGCGAGGGCCGCCCTACGAG  
GCCTTTCAGACCGCTAAGCTGAAGGTGACCAAGGGTGGCCCCCTGCCCTTCGCCTGGGACATCCTGTCCCCTCAGTTCATG  
TACGGCTCCAAGGCCTACATTAAGCACCCAGCCGACATCCCCGACTACTTCAAGCTGTCTTCCCCGAGGGCTTCAGGTGG  
GAGCGCGTGATGAAGTTCGAGGACGGCGGCATTATTACGTTAACCAGGACTCCTCCCTGCAGGACGGCGTATTTCATCTAC  
AAGGTGAAGCTGCGCGGCACCAACTTCCCCCCCCGACGGCCCCGTAATGCAGAAGAAGACCATGGGCTGGGAGGCTACGCGT  
GACCAACTGACTGAGGAGCAGATCGCAGAATTTAAAGAGGCTTTCTCCCTATTTGACAAGGACGGGGATGGGACGATAACA  
ACCAAGGAGCTGGGGACGGTGATGCGGTCTCTGGGGCAGAACCCACAGAAGCAGAGCTGCAGGACATGATCAATGAAGTA  
GATGCCGACGGTGACGGCACATTCGACTTCCCTGAGTTCCTGACGATGATGGCAAGAAAAATGAATGACACAGACAGTGAA  
GAGGAAATTAGAGAAGCGTTCCGCGTGTTTGATAAGGACGGCAATGGCTACATCGGCGCAGCAGAGCTTCGCCACGTGATG  
ACAGACCTTGGAGAGAAGTTAACAGATGAGGAGGTTGATGAAATGATCAGGGTAGCAGACATCGATGGGGATGGTCAGGTA  
AACTACGAAGAGTTTGTCCAATGATGACAGCGAAGGGATCCATGTCTGACATAGAAGAGGTGGTGGAAAGTACGAGGAG  
GAGGAGCAGGAAGAAGCAGCTGTTGAAGAGCAGGAGGAGGCAGCGGAAGAGGATGCTGAAGCAGAGGCTGAGACCGAGGAG  
ACCAGGGCAGAAGAAGATGAAGAAGAAGAGGAAGCAAAGGAGGCTGAAGATGGCCCAATGGAGGAGTCCAAACCAAAGCCC  
AGGTCGTTTCATGCCCAACTTGGTGCCTCCCAAGATCCCCGATGGAGAGAGAGTGGACTTTGATGACATCCACCGGAAGCGC  
ATGGAGAAGGACCTGAATGAGTTGCAGGCGCTGATTGAGGCTCACTTTGAGAACAGGAAGAAAAGAGGAGGAGGAGCTCGTT  
TCTCTCAAAGACAGGATCGAGAGACGTCGGGCAGAGCGGGCCGAGCAGCAGCGCATCCGGAATGAGCGGGAGAAGGAGCGG  
CAGAACC GCCTGGCTGAAGAGAGGGCTCGACGAGAGGAGGAGGAGAACAGGAGGAAGGCTGAGGATGAGGCCCGGAAGAAG  
AAGGCTTTGTCCAACATGATGCATTTTGGGGGTTACATCCAGAAGCAGGCCAGACAGAGCGGAAAAGTGGGAAGAGGCAG  
ACTGAGCGGGAAAAGAAGAAGAAGATTCTGGCTGAGAGGAGGAAGGTGCTGGCCATTGACCACCTGAATGAAGATCAGCTG  
AGGGAGAAGGCCAAGGAGCTGTGGCAGAGCATCTATAACTTGGAGGCAGAGAAGTTCGACCTGCAGGAGAAGTTCAAGCAG  
CAGAAATATGAGATCAATGTTCTCCGAAACAGGATCAACGATAACCAGAAAGTCTCCAAGACCCGCGGGAAGGCTAAAGTC  
ACCGGGCGCTGGAAATAG

## RGECO-TnT amino acid sequence

MVDSSRRKWNKAGHAVRAIGRLSSPVVSEMYPEDGALKSEIKKGLRLKDGHHYAAEVKTTYKAKKPVQLPGAYIVDIKLD  
IVSHNEDYTIIVEQCERAEGRHSTGGMDELYKGGTGGSLVSKGEEDNMAI I KEFMRFKVHMEGSVNGHEFEIEGEGEGRPYE  
AFQTAKLKVTKGGPLPFAWDILSPQFMYGSKAYIKHPADIPDYFKLSFPEGFRWERVMNFDGGI I HVNQDSSLQDGVFIY  
KVKLRGTNFPDPGPMQKKTMGWEATRDLTEEQIAEFKEAFSLFDKDGDTITTKELGTVMRSLGQNPTEAELQDMINEV  
DADGDGTFDFPEFLTMMARKMNDTDSEEEIREAFRVFDKDGNGYIGAAELRHVMTDLGEKLTDEEVDEMIRVADIDGDGQV  
NYEEFVQMMTAKGSMSDIEEVVEEYEEEEQEAAVEEQEEAAEEDAEAEAETEETRAEEDEEEEEAKEAEDGPMEESKPKP  
RSFMPNLVPPKIPDGERVDFDDIHRKRMEKDLNELQALIEAHFENRKKEEELVSLKDR IERRRAERAEQQRIRNEREKER  
QNLRAEERARREEEENRRKAEDEARKKKALSNNMHFGGYIQKQAQTERKSGKRQTEREKKKKILAERRKVLAI DHLNEDQL  
REKAKELWQSIYNLEAEKFDLQEKFKQQKYEINVLNRNINDNQKVS KTRGKAKVTGRWK.

**Online Figure X. DNA and amino acid sequence of RGECO-TnT.** Sequence highlighted red is RGECO, purple is human cardiac TnT and black is a BamHI cloning site which corresponds to an additional GS linker sequence in the translated amino acid.

## RGECO-TnI DNA sequence

ATGGTAGACTCATCACGTCGTAAGTGAATAAGGCAGGTCACGCAGTCAGAGCTATAGGTTCGGCTGAGCTCACCCGTGGTT  
TCCGAGCGGATGTACCCCGAGGACGGCGCCCTCAAGAGCGAGATCAAGAAGGGGCTGAGGCTGAAGGACGGCGGCCACTAC  
GCCGCCGAGGTCAAGACCACCTACAAGGCCAAGAAGCCCGTGCAGCTGCCCGGCGCTACATCGTAGACATCAAGTTGGAC  
ATCGTGTCCCAACAACGAGGACTACACCATCGTGGAAACAGTGCGAACGCGCCGAGGGCCGCACTCCACCGGCGGCATGGAC  
GAGCTATAACAAGGGAGGTACAGGCGGGAGTCTGGTGGCAAGGGCGAGGAGGATAACATGGCCATCATCAAGGAGTTCATG  
CGCTTCAAGGTGCACATGGAGGGCTCCGTGAACGGCCACGAGTTCGAGATCGAGGGCGAGGGCGAGGGCCGCCCTACGAG  
GCCTTTCAGACCGCTAAGCTGAAGGTGACCAAGGGTGGCCCCCTGCCCTTCGCCTGGGACATCCTGTCCCCCTCAGTTCATG  
TACGGCTCCAAGGCCTACATTAAGCACCCAGCCGACATCCCCGACTACTTCAAGCTGTCCCTTCCCGAGGGCTTCAGGTGG  
GAGCGCGTGATGAACTTCGAGGACGGCGGCATTATTACGTTAACCAGGACTCCTCCCTGCAGGACGGCGTATTTCATCTAC  
AAGGTGAAGCTGCGCGGCACCAACTTCCCCCGACGGCCCCGTAATGCAGAAGAAGACCATGGGCTGGGAGGCTACGCGT  
GACCAACTGACTGAGGAGCAGATCGCAGAATTTAAAGAGGCTTTCTCCCTATTTGACAAGGACGGGGATGGGACGATAACA  
ACCAAGGAGCTGGGGACGGTGATGCGGTCTCTGGGGCAGAACCCACAGAAGCAGAGCTGCAGGACATGATCAATGAAGTA  
GATGCCGACGGTGACGGCACATTCGACTTCCCTGAGTTTCTGACGATGATGGCAAGAAAAATGAATGACACAGACAGTGAA  
GAGAAATTAGAGAAGCGTTCCGCGTGTTTGATAAGGACGGCAATGGCTACATCGGCGCAGCAGAGCTTCGCCACGTGATG  
ACAGACCTTGGAGAGAAGTTAACAGATGAGGAGGTTGATGAAATGATCAGGGTAGCAGACATCGATGGGGATGGTCAGGTA  
AACTACGAAGAGTTTGTCCAAATGATGACAGCGAAGCTCGAGATGGCGGATGGGAGCAGCGATGCGGCTAGGGAACCTCGC  
CCTGCACCAGCCCCAATCAGACGCCGCTCCTCCAACCTACCGCGCTTATGCCACGGAGCCGCACGCCAAGAAAAATCTAAG  
ATCTCCGCTTCTAGAAAATTGCAGCTGAAGACTCTGCTGCTGCAGATTGCAAAGCAAGAGCTGGAGCGAGAGGCGGAGGAG  
CGGCGCGGAGAGAAGGGGCGCGCTCTGAGCACCCGCTGCCAGCCGCTGGAGTTGACCGGGCTGGGCTTCGCGGAGCTGCAG  
GACTTGTGCCGACAGCTCCACGCCCGTGTGGACAAGGTGGATGAAGAGAGATACGACATAGAGGCAAAAAGTCACCAAGAAC  
ATCACGGAGATTGCAGATCTGACTCAGAAGATCTTTGACCTTCGAGGCAAGTTTAAAGCGGCCACCCTGCGGAGAGTGAGG  
ATCTCTGCAGATGCCATGATGCAGGCGCTGCTGGGGGCCCCGGGCTAAGGAGTCCCTGGACCTGCGGGCCACCCTCAAGCAG  
GTGAAGAAGGAGGACACCGAGAAGGAAAACCGGGAGGTGGGAGACTGGCGGAAGAACATCGATGCACTGAGTGGAATGGAG  
GGCCGCAAGAAAAGTTTGAGAGCTGA

## RGECO-TnI amino acid sequence

MVDSSRRKWNKAGHAVRAIGRLSSPVVSEMYPEDGALKSEIKKGLRLKDGGHYAAEVKTTYKAKKPVQLPGAYIVDIKLD  
IVSHNEDYTIVEQCERAEGRHSTGGMDELYKGGTGGSLVSKGEEDNMAI I KEFMRFKVHMEGSVNGHEFEIEGEGEGRPYE  
AFQTAKLKVTKGGPLPFAWDILSPQFMYGSKAYIKHPADIPDYFKLSFPEGFRWERVMNFEDGGI IHVNQDSSLQDGVFIY  
KVKLRGTFNFPDGPVMQKKTMGWEATRDLTEEQIAEFKEAFSLFDKDGDTITTKELGTVMRSLGQNPTEAELQDMINEV  
DADGDGTFDFPEFLTMMARKMNDTDSEEEIREAFRVFDKDGNGYI GAAELRHVMTDLGEKLTDEEVDEMI RVADIDGDGQV  
NYEEFVQMMTAKLE MADGSSDAAREPRPAPAPIRRRSSNYRAYATEPHAKKSKISASRKLQLKTL LLQIAKQELEREAE  
RRGEKGRALSTRCQPLELTGLGFAELQDLCRQLHARVDKVDEERYDIEAKVTKNITEIADLTQKIFDLRGKFKRPTLRRVR  
ISADAMMQALLGARAKESLDLRAHLKQVKKEDTEKENREVGDRKNIDALSGMEGRKKKFFES .

**Online Figure XI. DNA and amino acid sequence of RGECO-TnI.** Sequence highlighted red is RGECO, blue is human cardiac TnI and black is a XhoI cloning site which corresponds to an additional LE linker sequence in the translated amino acid.

|                                           | GFP-TnT      | TnT-GFP               | GFP-TnI      | TnI-GFP                | GFP-TnC                | TnC-GFP              |
|-------------------------------------------|--------------|-----------------------|--------------|------------------------|------------------------|----------------------|
| <b><math>\Delta pCa_{50}</math></b>       | -0.031±0.018 | -0.149±0.056          | 0.028±0.015  | -0.279±0.624           | 0.564±0.269            | -0.369±0.125         |
| <b><math>\Delta n_H</math></b>            | 0.980±0.691  | 7.308±3.703           | 0.505±1.085  | <b>-2.158±0.170 **</b> | 0.8649±0.598           | -0.867±0.912         |
| <b><math>\Delta Min (sec^{-1})</math></b> | 0.548±0.219  | 0.185±0.089           | 0.235±0.114  | <b>3.096±1.105 *</b>   | <b>6.551±0.969 ***</b> | <b>5.382±1.874 *</b> |
| <b><math>\Delta Max (sec^{-1})</math></b> | 0.686±0.588  | <b>-2.958±0.399 *</b> | -0.036±0.270 | 0.787±0.457            | 1.479±0.798            | <b>1.439±0.545 *</b> |

**Online Table I. Extracted parameters from *in vitro* actin activated acto-myosin S1 ATPase assays performed to investigate myofilament function in the presence of GFP conjugates of the troponin complex.**  $\Delta$  values from paired experimental comparisons for  $pCa_{50}$ ,  $n_H$ , maximum and minimum activity ( $sec^{-1}$ ) with standard error and significance. n=5, significance values comparing unconjugated with GFP conjugated troponin are  $p<0.001=***$ ,  $p<0.01=**$  and  $p<0.05=*$  using a students t-test.

|                                                                                                     | <b>RGECO</b> | <b>RGECO-TnT</b> | <b>RGECO-Tnl</b> |
|-----------------------------------------------------------------------------------------------------|--------------|------------------|------------------|
| $K_d$ at 25 °C (nM)                                                                                 | 1607         | 1186             | 1105             |
| $K_d$ at 37 °C (nM)                                                                                 | 860          | 764              | 657              |
| Quantum Yield pCa 4.5 ( $\Phi$ )                                                                    | 0.20         | 0.33             | 0.3              |
| Quantum Yield pCa 8.5 ( $\Phi$ )                                                                    | 0.06         | 0.11             | 0.1              |
| Molar Extinction coefficient pCa 4.5 ( $\epsilon$ ( $\text{mM}^{-1}\cdot\text{cm}^{-1}$ )) (565 nm) | 32.39        | 34.53            | 35.87            |
| Molar Extinction coefficient pCa 8.5 ( $\epsilon$ ( $\text{mM}^{-1}\cdot\text{cm}^{-1}$ )) (565 nm) | 5.17         | 6.64             | 6.85             |
| Molar Extinction coefficient pCa 4.5 ( $\epsilon$ ( $\text{mM}^{-1}\cdot\text{cm}^{-1}$ )) (455 nm) | 4.16         | 6.18             | 6.2              |
| Molar Extinction coefficient pCa 8.5 ( $\epsilon$ ( $\text{mM}^{-1}\cdot\text{cm}^{-1}$ )) (455 nm) | 11.25        | 14.11            | 16.36            |
| Brightness pCa 4.5 ( $\text{mM}^{-1}\cdot\text{cm}^{-1}$ )                                          | 6.48         | 11.30            | 13.58            |
| Brightness pCa 8.5 ( $\text{mM}^{-1}\cdot\text{cm}^{-1}$ )                                          | 0.31         | 0.73             | 1.21             |
| Intensity change $\pm$ $\text{Ca}^{2+}$                                                             | 10.18x       | 10.33x           | 11.25x           |

**Online Table II. Extracted parameters from fluorescence and absorbance spectra and kinetic experiments.**  
 Brightness is defined as the product of  $\epsilon$  and  $\Phi$ .

| Sensor           | <i>n</i> | Time to 50%<br>Ca <sup>2+</sup> Binding<br>(sec) | Time to 50%<br>Ca <sup>2+</sup> Release<br>(sec) |
|------------------|----------|--------------------------------------------------|--------------------------------------------------|
| <b>RGECO</b>     | 108      | 0.058±0.003                                      | 0.308±0.012                                      |
| <b>RGECO-TnT</b> | 55       | <b>0.105±0.007 ***</b>                           | <b>0.282±0.011 **</b>                            |
| <b>RGECO-TnI</b> | 112      | <b>0.097±0.004 ***</b>                           | <b>0.267±0.006 ***</b>                           |

**Online Table III. Extracted parameters of GPCM Ca<sup>2+</sup> transients transduced with RGECO, RGECO-TnT or RGECO-TnI.** Extracted values from a paired comparison of GPCMs adenovirally transduced with RGECO, RGECO-TnT or RGECO-TnI. *n* = total cell number from at least 3 separate cell isolations, ± = standard error. Significance values comparing RGECO to RGECO-TnT or RGECO-TnI are  $p < 0.01 = **$  and  $p < 0.001 = ***$ . RGECO-TnT verses RGECO-TnI = ns for all parameters, using a Kruskal Wallis non parametric test.

A

| Sensor | Mutant     | <i>n</i> | Relative RGECO Peak Intensity | Time to 50% Ca <sup>2+</sup> Binding (sec) | Time to 50% Ca <sup>2+</sup> Release (sec) | Time of Peak (sec)     |
|--------|------------|----------|-------------------------------|--------------------------------------------|--------------------------------------------|------------------------|
| RGECO  | WT cTnT    | 94       | 1.00±0.041                    | 0.066±0.002                                | 0.219±0.006                                | 0.288±0.007            |
| RGECO  | cTnT R92Q  | 94       | 0.99±0.045                    | <b>0.102±0.004 ***</b>                     | <b>0.247±0.006 **</b>                      | <b>0.365±0.007 ***</b> |
| RGECO  | WT cTnI    | 107      | 1.00±0.037                    | 0.070±0.002                                | 0.198±0.004                                | 0.281±0.006            |
| RGECO  | cTnI R145G | 103      | <b>1.60±0.058 ***</b>         | <b>0.083±0.002 ***</b>                     | <b>0.255±0.005 ***</b>                     | <b>0.345±0.008 ***</b> |

B

| Sensor    | Mutant     | <i>n</i> | Relative RGECO Peak Intensity | Time to 50% Ca <sup>2+</sup> Binding (sec) | Time to 50% Ca <sup>2+</sup> Release (sec) | Time of Peak (sec)     |
|-----------|------------|----------|-------------------------------|--------------------------------------------|--------------------------------------------|------------------------|
| RGECO-TnI | WT cTnT    | 102      | 1.00±0.039                    | 0.087±0.003                                | 0.194±0.004                                | 0.333±0.007            |
| RGECO-TnI | cTnT R92Q  | 115      | <b>1.32±0.053 ***</b>         | <b>0.128±0.005 ***</b>                     | <b>0.247±0.004 ***</b>                     | <b>0.424±0.008 ***</b> |
| RGECO-TnT | WT cTnI    | 123      | 1.00±0.030                    | 0.082±0.003                                | 0.202±0.005                                | 0.338±0.008            |
| RGECO-TnT | cTnI R145G | 127      | <b>1.16±0.042 **</b>          | <b>0.094±0.003 **</b>                      | <b>0.247±0.005 ***</b>                     | <b>0.391±0.010 ***</b> |

**Online Table IV. Extracted parameters of GPCMs transduced with RGECO or myofilament localised RGECO and WT/HCM mutant troponin.** Extracted Ca<sup>2+</sup> transient values from GPCMs adenovirally transduced with RGECO (A) or RGECO-TnI/RGECO-TnT (B) and either WT cTnT, cTnT R92Q, WT cTnI, or cTnI R145G. *n* = total cell number from at least 3 separate cell isolations, ± = standard error. Significant values comparing either WT cTnT to cTnT R92Q or WT cTnI to cTnI R145G are  $p < 0.001 = ***$ , or  $p < 0.01 = **$  using a Mann Whitney test.
